# Supplementary material
Source: PubMed Central journal article supplement (PMC3024439)
Supplement: NIHMS124336-supplement-01.pdf [file NIHMS124336-supplement-01.pdf]

1 **ONLINE SUPPLEMENT:**

2  
3 **Factors Associated with Asthma Exacerbations During a Long-term Clinical Trial**  
4 **of Controller Medications in Children**

5  
6 Ronina A. Covar. MD<sup>a</sup>, Stanley J. Szeffler MD<sup>a</sup>, Robert S. Zeiger MD, PhD<sup>b</sup>, Christine A.  
7 Sorkness PharmD<sup>c</sup>, Mark Moss MD<sup>c</sup>, David T. Mauger PhD<sup>f</sup>, Susan J. Boehmer PhD<sup>f</sup>, Robert C.  
8 Strunk MD<sup>e</sup>, Fernando D. Martinez MD<sup>d</sup>, and Lynn M. Taussig MD<sup>a</sup> for the Childhood Asthma  
9 Research and Education Network

10  
11 From <sup>a</sup>Department of Pediatrics, National Jewish Medical and Research Center and University of  
12 Colorado Health Sciences Center, Denver; <sup>b</sup>Department of Pediatrics, University of California  
13 San Diego and Department of Allergy, Kaiser Permanente, San Diego, <sup>c</sup>the Clinical Science  
14 Center, University of Wisconsin, Madison; the Department of Pediatrics, University of  
15 California-San Diego; <sup>d</sup>Arizona Respiratory Center, The University of Arizona, Tucson; <sup>e</sup>the  
16 Department of Pediatrics, Washington University, St. Louis; and <sup>f</sup>the Department of Public  
17 Health Sciences, Pennsylvania State University, Hershey

18  
19 **Supported by:**

20 Grants 5U10HL064287, 5U10HL064288, 5U10HL064295, 5U10HL064307, 5U10HL064305,  
21 5U10HL064313 from the National Heart, Lung, and Blood Institute; General Clinical Research  
22 Centers at Washington University School of Medicine (M01 RR00036) and National Jewish  
23 Medical and Research Center (M01 RR00051).

24  
25  
26  
27 **Address correspondence to:**

28 Ronina A. Covar, M.D.  
29 National Jewish Medical and Research Center  
30 1400 Jackson Street  
31 Denver, CO 80206  
32 Phone: (303)3981876  
33 Fax: (303)2702189  
34 **covarr@njc.org**

35

36 **eFigure legend:**

37

38 eFigure 1: Sensitivity values expressed as percentages of participants in the different treatment

39 groups (— montelukast, — PACT combination, and — FP monotherapy) reporting any of or

40 combination of the following “recent” changes: (a) symptoms (i.e. 2 point increase); (b)

41 albuterol use (at least 8 inhalations per day of the exacerbations; (c) PEF (20% reduction); d)

42 any of the three changes.

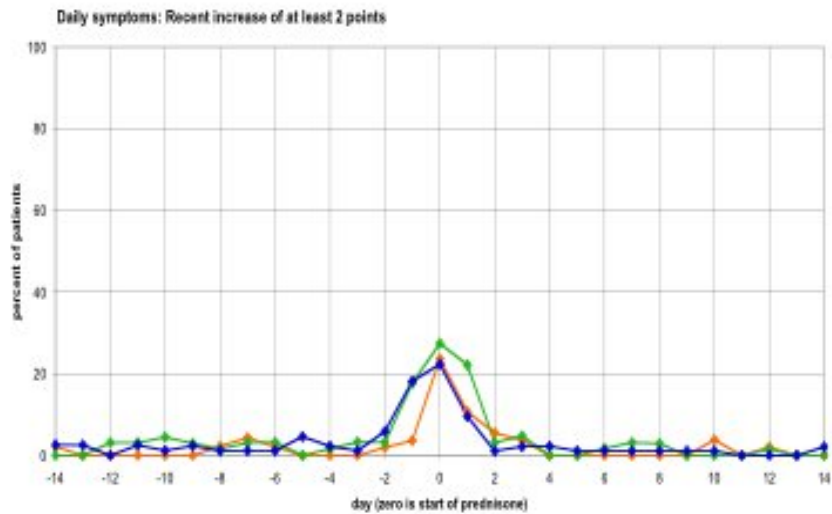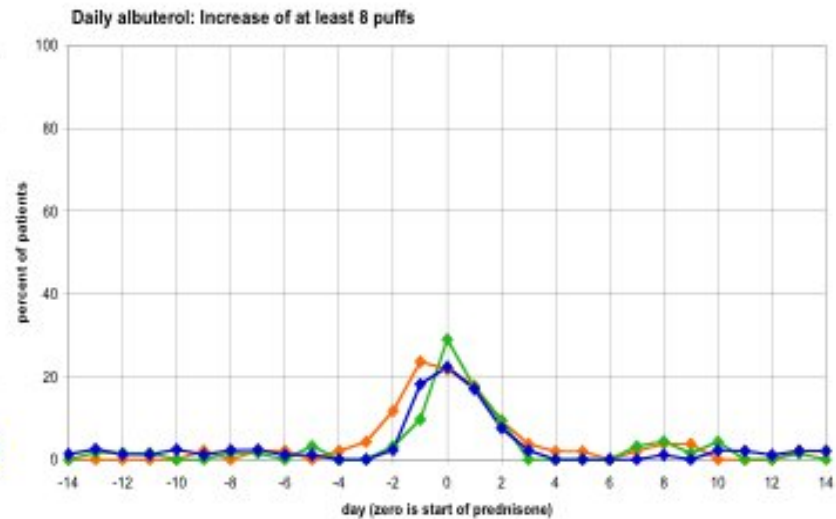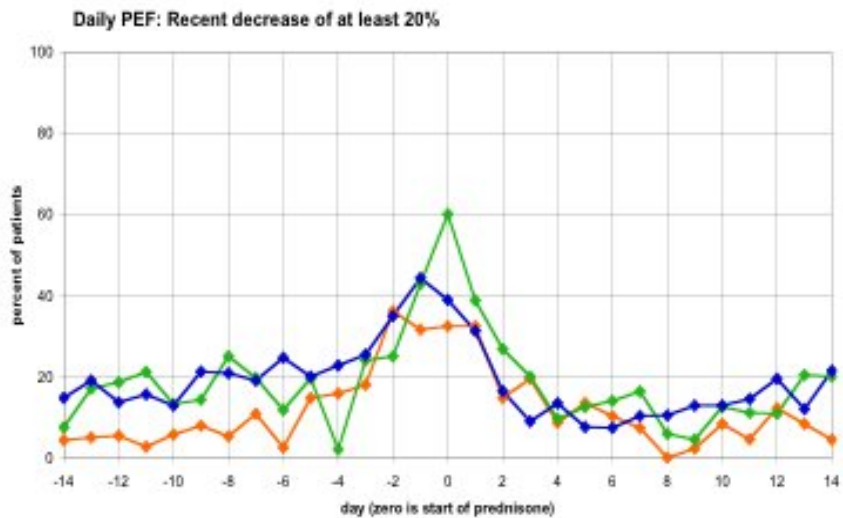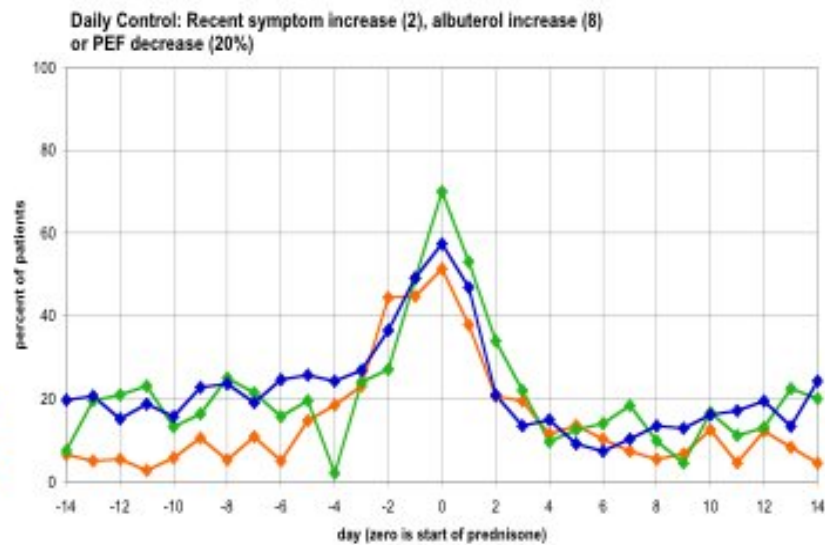

44 **eTable 1:** Sensitivity and specificity values of diary card documented changes in the Pediatric Asthma Controller Trial (PACT) indicative of 20%  
 45 reduction in peak expiratory flow (PEF) , a 2-level increase in symptom severity score, and albuterol use of 8 inhalations within a 24 hour period

| day                 | Montelukast |                      |            |           | PACT combination |                      |            |           | FP monotherapy |                      |            |           |
|---------------------|-------------|----------------------|------------|-----------|------------------|----------------------|------------|-----------|----------------|----------------------|------------|-----------|
|                     | Symptoms    | Albuterol rescue use | PEF change | overall   | Symptoms         | Albuterol rescue use | PEF change | overall   | Symptoms       | Albuterol rescue use | PEF change | overall   |
| -14                 | 3           | 1                    | 15         | 20        | 0                | 0                    | 8          | 8         | 2              | 0                    | 4          | 7         |
| -13                 | 3           | 3                    | 19         | 21        | 0                | 2                    | 17         | 20        | 0              | 0                    | 5          | 5         |
| -12                 | 0           | 1                    | 14         | 15        | 3                | 2                    | 19         | 21        | 0              | 0                    | 5          | 5         |
| -11                 | 3           | 1                    | 16         | 19        | 3                | 2                    | 21         | 23        | 0              | 0                    | 3          | 3         |
| -10                 | 1           | 2                    | 13         | 16        | 4                | 0                    | 13         | 13        | 0              | 0                    | 6          | 6         |
| -9                  | 2           | 1                    | 21         | 23        | 3                | 0                    | 14         | 16        | 0              | 2                    | 8          | 11        |
| -8                  | 1           | 2                    | 21         | 24        | 2                | 2                    | 25         | 25        | 2              | 0                    | 5          | 5         |
| -7                  | 1           | 2                    | 19         | 19        | 3                | 2                    | 20         | 21        | 4              | 2                    | 11         | 11        |
| -6                  | 1           | 1                    | 25         | 25        | 3                | 0                    | 12         | 16        | 2              | 2                    | 3          | 5         |
| -5                  | 5           | 1                    | 20         | 26        | 0                | 3                    | 20         | 20        | 0              | 0                    | 15         | 15        |
| -4                  | 2           | 0                    | 23         | 24        | 2                | 0                    | 2          | 2         | 0              | 2                    | 16         | 18        |
| -3                  | 1           | 0                    | 25         | 27        | 3                | 0                    | 24         | 24        | 0              | 4                    | 18         | 23        |
| -2                  | 6           | 2                    | 35         | 37        | 3                | 3                    | 25         | 27        | 2              | 12                   | 36         | 44        |
| -1                  | 18          | 18                   | 44         | 49        | 18               | 10                   | 43         | 49        | 4              | 24                   | 32         | 45        |
| 0                   | 22          | 22                   | 39         | 57        | 27               | 29                   | 60         | 70        | 24             | 22                   | 32         | 51        |
| 1                   | 10          | 17                   | 31         | 47        | 22               | 17                   | 39         | 53        | 11             | 18                   | 32         | 38        |
| 2                   | 1           | 8                    | 16         | 21        | 3                | 10                   | 27         | 34        | 6              | 9                    | 15         | 21        |
| 3                   | 2           | 2                    | 9          | 13        | 5                | 0                    | 20         | 22        | 4              | 4                    | 19         | 19        |
| 4                   | 2           | 0                    | 13         | 15        | 0                | 0                    | 10         | 10        | 0              | 2                    | 9          | 11        |
| 5                   | 1           | 0                    | 8          | 9         | 0                | 0                    | 13         | 13        | 0              | 2                    | 14         | 14        |
| 6                   | 1           | 0                    | 7          | 7         | 2                | 0                    | 14         | 14        | 0              | 0                    | 10         | 10        |
| 7                   | 1           | 0                    | 10         | 10        | 3                | 3                    | 16         | 18        | 0              | 2                    | 7          | 7         |
| 8                   | 1           | 1                    | 10         | 13        | 3                | 4                    | 6          | 10        | 0              | 4                    | 0          | 5         |
| 9                   | 1           | 0                    | 13         | 13        | 0                | 2                    | 4          | 4         | 0              | 4                    | 2          | 7         |
| 10                  | 1           | 2                    | 13         | 16        | 0                | 4                    | 13         | 17        | 4              | 0                    | 8          | 13        |
| 11                  | 0           | 2                    | 14         | 17        | 0                | 0                    | 11         | 11        | 0              | 0                    | 5          | 5         |
| 12                  | 0           | 1                    | 19         | 19        | 1                | 0                    | 11         | 13        | 2              | 0                    | 12         | 12        |
| 13                  | 0           | 2                    | 12         | 13        | 0                | 1                    | 20         | 22        | 0              | 2                    | 8          | 8         |
| 14                  | 2           | 2                    | 21         | 24        | 0                | 0                    | 20         | 20        | 0              | 2                    | 4          | 4         |
| <b>SPECIFICITY*</b> | <b>99</b>   | <b>100</b>           | <b>88</b>  | <b>88</b> | <b>99</b>        | <b>100</b>           | <b>88</b>  | <b>87</b> | <b>99</b>      | <b>100</b>           | <b>91</b>  | <b>91</b> |

46 \*Using data from participants who did not have an exacerbation in the trial

47 **eTable 2:** Positive predictive values of diary card documented changes in the Pediatric Asthma Controller Trial (PACT) indicative of  
 48 20% reduction in peak expiratory flow (PEF), a 2-level increase in symptom severity score, and albuterol use of 8 inhalations within a  
 49 24 hour period

| day | Montelukast |                      |            |         | PACT combination |                      |            |         | FP monotherapy |                      |            |         |
|-----|-------------|----------------------|------------|---------|------------------|----------------------|------------|---------|----------------|----------------------|------------|---------|
|     | Symptoms    | Albuterol rescue use | PEF change | overall | Symptoms         | Albuterol rescue use | PEF change | overall | Symptoms       | Albuterol rescue use | PEF change | overall |
| -14 | 2           | 1                    | 13         | 17      | 0                | 0                    | 7          | 7       | 2              | 0                    | 4          | 6       |
| -13 | 2           | 2                    | 17         | 18      | 0                | 2                    | 15         | 17      | 0              | 0                    | 5          | 5       |
| -12 | 0           | 1                    | 12         | 14      | 3                | 1                    | 16         | 18      | 0              | 0                    | 5          | 5       |
| -11 | 2           | 1                    | 14         | 17      | 3                | 1                    | 18         | 20      | 0              | 0                    | 3          | 3       |
| -10 | 1           | 2                    | 12         | 14      | 4                | 0                    | 12         | 12      | 0              | 0                    | 5          | 5       |
| -9  | 2           | 1                    | 18         | 19      | 3                | 0                    | 13         | 15      | 0              | 2                    | 7          | 10      |
| -8  | 1           | 2                    | 18         | 20      | 1                | 1                    | 21         | 21      | 2              | 0                    | 5          | 5       |
| -7  | 1           | 2                    | 17         | 17      | 3                | 1                    | 17         | 18      | 4              | 2                    | 10         | 10      |
| -6  | 1           | 1                    | 20         | 21      | 3                | 0                    | 11         | 14      | 2              | 2                    | 2          | 5       |
| -5  | 4           | 1                    | 17         | 21      | 0                | 3                    | 17         | 17      | 0              | 0                    | 13         | 13      |
| -4  | 2           | 0                    | 19         | 20      | 1                | 0                    | 2          | 2       | 0              | 2                    | 14         | 16      |
| -3  | 1           | 0                    | 21         | 22      | 3                | 0                    | 20         | 20      | 0              | 4                    | 15         | 19      |
| -2  | 5           | 2                    | 27         | 28      | 3                | 3                    | 21         | 22      | 2              | 10                   | 27         | 31      |
| -1  | 14          | 14                   | 32         | 34      | 14               | 8                    | 31         | 34      | 3              | 18                   | 24         | 31      |
| 0   | 17          | 17                   | 29         | 38      | 20               | 21                   | 39         | 42      | 18             | 17                   | 25         | 34      |
| 1   | 8           | 14                   | 25         | 33      | 17               | 14                   | 29         | 36      | 9              | 14                   | 25         | 28      |
| 2   | 1           | 7                    | 15         | 18      | 3                | 8                    | 22         | 26      | 5              | 8                    | 13         | 17      |
| 3   | 2           | 2                    | 9          | 12      | 4                | 0                    | 17         | 19      | 3              | 3                    | 16         | 17      |
| 4   | 2           | 0                    | 12         | 14      | 0                | 0                    | 9          | 9       | 0              | 2                    | 8          | 10      |
| 5   | 1           | 0                    | 7          | 9       | 0                | 0                    | 12         | 12      | 0              | 2                    | 12         | 12      |
| 6   | 1           | 0                    | 7          | 7       | 2                | 0                    | 13         | 13      | 0              | 0                    | 9          | 9       |
| 7   | 1           | 0                    | 10         | 10      | 3                | 3                    | 15         | 16      | 0              | 2                    | 7          | 7       |
| 8   | 1           | 1                    | 10         | 12      | 3                | 4                    | 6          | 9       | 0              | 3                    | 0          | 5       |
| 9   | 1           | 0                    | 12         | 12      | 0                | 1                    | 4          | 4       | 0              | 3                    | 2          | 6       |
| 10  | 1           | 2                    | 12         | 15      | 0                | 4                    | 12         | 15      | 3              | 0                    | 8          | 11      |
| 11  | 0           | 2                    | 13         | 15      | 0                | 0                    | 10         | 10      | 0              | 0                    | 4          | 4       |
| 12  | 0           | 1                    | 17         | 17      | 1                | 0                    | 10         | 12      | 2              | 0                    | 11         | 11      |
| 13  | 0           | 2                    | 11         | 12      | 0                | 1                    | 18         | 19      | 0              | 2                    | 8          | 8       |
| 14  | 2           | 2                    | 18         | 20      | 0                | 0                    | 17         | 17      | 0              | 2                    | 4          | 4       |

52 **eTable 3:** Negative predictive values of diary card documented changes in the Pediatric Asthma Controller Trial (PACT) indicative of  
 53 20% reduction in peak expiratory flow (PEF), a 2-level increase in symptom severity score, and albuterol use of 8 inhalations within a  
 54 24 hour period

| day | Montelukast |                      |            |         | PACT combination |                      |            |         | FP monotherapy |                      |            |         |
|-----|-------------|----------------------|------------|---------|------------------|----------------------|------------|---------|----------------|----------------------|------------|---------|
|     | Symptoms    | Albuterol rescue use | PEF change | overall | Symptoms         | Albuterol rescue use | PEF change | overall | Symptoms       | Albuterol rescue use | PEF change | overall |
| -14 | 52          | 52                   | 53         | 54      | 52               | 52                   | 51         | 51      | 52             | 52                   | 51         | 51      |
| -13 | 52          | 53                   | 54         | 54      | 52               | 52                   | 54         | 54      | 52             | 52                   | 51         | 51      |
| -12 | 52          | 52                   | 53         | 53      | 53               | 52                   | 54         | 55      | 52             | 52                   | 51         | 51      |
| -11 | 52          | 52                   | 53         | 54      | 53               | 52                   | 55         | 55      | 52             | 52                   | 50         | 50      |
| -10 | 52          | 52                   | 52         | 53      | 53               | 52                   | 52         | 52      | 52             | 52                   | 51         | 51      |
| -9  | 52          | 52                   | 55         | 55      | 53               | 52                   | 53         | 53      | 52             | 52                   | 52         | 52      |
| -8  | 52          | 52                   | 55         | 55      | 52               | 52                   | 56         | 56      | 52             | 52                   | 51         | 51      |
| -7  | 52          | 52                   | 54         | 54      | 53               | 52                   | 54         | 55      | 53             | 52                   | 53         | 52      |
| -6  | 52          | 52                   | 56         | 56      | 53               | 52                   | 52         | 53      | 52             | 52                   | 50         | 51      |
| -5  | 53          | 52                   | 54         | 56      | 52               | 53                   | 54         | 54      | 52             | 52                   | 54         | 54      |
| -4  | 52          | 52                   | 55         | 56      | 52               | 52                   | 49         | 49      | 52             | 52                   | 54         | 55      |
| -3  | 52          | 52                   | 56         | 56      | 53               | 52                   | 56         | 55      | 52             | 53                   | 55         | 56      |
| -2  | 53          | 52                   | 59         | 60      | 53               | 53                   | 56         | 57      | 52             | 55                   | 61         | 64      |
| -1  | 57          | 57                   | 63         | 65      | 57               | 54                   | 63         | 65      | 53             | 59                   | 59         | 64      |
| 0   | 58          | 58                   | 61         | 69      | 60               | 60                   | 70         | 76      | 58             | 58                   | 59         | 67      |
| 1   | 54          | 57                   | 58         | 64      | 58               | 57                   | 61         | 67      | 55             | 57                   | 59         | 61      |
| 2   | 52          | 54                   | 53         | 55      | 53               | 54                   | 57         | 59      | 53             | 54                   | 54         | 55      |
| 3   | 52          | 52                   | 51         | 52      | 53               | 52                   | 54         | 55      | 53             | 53                   | 55         | 55      |
| 4   | 52          | 52                   | 52         | 53      | 52               | 52                   | 51         | 51      | 52             | 52                   | 52         | 53      |
| 5   | 52          | 52                   | 51         | 51      | 52               | 52                   | 52         | 52      | 52             | 52                   | 53         | 53      |
| 6   | 52          | 52                   | 51         | 51      | 52               | 52                   | 53         | 52      | 52             | 52                   | 52         | 52      |
| 7   | 52          | 52                   | 52         | 51      | 53               | 53                   | 53         | 54      | 52             | 52                   | 52         | 51      |
| 8   | 52          | 52                   | 52         | 52      | 53               | 53                   | 50         | 51      | 52             | 53                   | 50         | 51      |
| 9   | 52          | 52                   | 52         | 52      | 52               | 52                   | 50         | 50      | 52             | 53                   | 50         | 51      |
| 10  | 52          | 52                   | 52         | 53      | 52               | 53                   | 52         | 53      | 53             | 52                   | 52         | 53      |
| 11  | 52          | 52                   | 53         | 53      | 52               | 52                   | 52         | 52      | 52             | 52                   | 51         | 51      |
| 12  | 52          | 52                   | 54         | 54      | 52               | 52                   | 52         | 52      | 52             | 52                   | 53         | 53      |
| 13  | 52          | 52                   | 52         | 52      | 52               | 52                   | 55         | 55      | 52             | 52                   | 52         | 52      |
| 14  | 52          | 52                   | 55         | 56      | 52               | 52                   | 54         | 54      | 52             | 52                   | 51         | 51      |
